RESEARCH ARTICLE

# Increased triacylglycerol - Fatty acid substrate cycling in human skeletal muscle cells exposed to eicosapentaenoic acid

Nils G. Løvsletten<sup>1\*</sup>, Siril S. Bakke<sup>2</sup>, Eili T. Kase<sup>1</sup>, D. Margriet Ouwens<sup>3,4,5</sup>, G. Hege Thoresen<sup>1,6</sup>, Arild C. Rustan<sup>1</sup>

**1** Department of Pharmaceutical Biosciences, School of Pharmacy, University of Oslo, Oslo, Norway, **2** Centre of Molecular Inflammation Research, and Department of Cancer Research and Molecular Medicine, Norwegian University of Science and Technology, Trondheim, Norway, **3** German Diabetes Center, Leibniz Center for Diabetes Research, Heinrich Heine University, Medical Faculty, Duesseldorf, Germany, **4** German Center for Diabetes Research (DZD), München-Neuherberg, Germany, **5** Department of Endocrinology, Ghent University Hospital, Ghent, Belgium, **6** Department of Pharmacology, Institute of Clinical Medicine, University of Oslo, Oslo, Norway

\* [n.g.lovsletten@farmasi.uio.no](mailto:n.g.lovsletten@farmasi.uio.no)

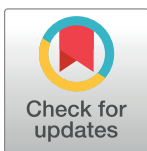

**OPEN ACCESS**

**Citation:** Løvsletten NG, Bakke SS, Kase ET, Ouwens DM, Thoresen GH, Rustan AC (2018) Increased triacylglycerol - Fatty acid substrate cycling in human skeletal muscle cells exposed to eicosapentaenoic acid. PLoS ONE 13(11): e0208048. <https://doi.org/10.1371/journal.pone.0208048>

**Editor:** Juan J. Llor, University of Illinois, UNITED STATES

**Received:** August 23, 2018

**Accepted:** November 9, 2018

**Published:** November 29, 2018

**Copyright:** © 2018 Løvsletten et al. This is an open access article distributed under the terms of the [Creative Commons Attribution License](https://creativecommons.org/licenses/by/4.0/), which permits unrestricted use, distribution, and reproduction in any medium, provided the original author and source are credited.

**Data Availability Statement:** All relevant data are within the manuscript and its Supporting Information files.

**Funding:** The work was supported by Anders Jahres Fond til Vitenskapens Fremme (NO), Diabetesforbundet, and Norges Forskningsråd. The funders had no role in study design, data collection and analysis, decision to publish, or preparation of the manuscript.

## Abstract

It has previously been shown that pretreatment of differentiated human skeletal muscle cells (myotubes) with eicosapentaenoic acid (EPA) promoted increased uptake of fatty acids and increased triacylglycerol accumulation, compared to pretreatment with oleic acid (OA) and palmitic acid (PA). The aim of the present study was to examine whether EPA could affect substrate cycling in human skeletal muscle cells by altering lipolysis rate of intracellular TAG and re-esterification of fatty acids. Fatty acid metabolism was studied in human myotubes using a mixture of fatty acids, consisting of radiolabelled oleic acid as tracer (<sup>14</sup>C-OA) together with EPA or PA. Co-incubation of myotubes with EPA increased cell-accumulation and incomplete fatty acid oxidation of <sup>14</sup>C-OA compared to co-incubation with PA. Lipid distribution showed higher incorporation of <sup>14</sup>C-OA into all cellular lipids after co-incubation with EPA relative to PA, with most markedly increases (3 to 4-fold) for diacylglycerol and triacylglycerol. Further, the increases in cellular lipids after co-incubation with EPA were accompanied by higher lipolysis and fatty acid re-esterification rate. Correspondingly, basal respiration, proton leak and maximal respiration were significantly increased in cells exposed to EPA compared to PA. Microarray and Gene Ontology (GO) enrichment analysis showed that EPA, related to PA, significantly changed i.e. the GO terms “Neutral lipid metabolic process” and “Regulation of lipid storage”. Finally, an inhibitor of diacylglycerol acyl-transferase 1 decreased the effect of EPA to promote fatty acid accumulation. In conclusion, incubation of human myotubes with EPA, compared to PA, increased processes of fatty acid turnover and oxidation suggesting that EPA may activate futile substrate cycling of fatty acids in human myotubes. Increased TAG—FA cycling may be involved in the potentially favourable effects of long-chain polyunsaturated n-3 fatty acids on skeletal muscle and whole-body energy metabolism.

**Competing interests:** The authors have declared that no competing interests exist.

**Abbreviations:** ASMs, acid soluble metabolites; BSA, bovine serum albumin; DGAT, diacylglycerol acyltransferase; DHA, docosahexaenoic acid; EPA, eicosapentaenoic acid; FA, fatty acid; GO, Gene Ontology; LA, linoleic acid; OA, oleic acid; OCR, oxygen consumption rate; PA, palmitic acid; PPAR, peroxisome proliferator-activated receptor; SPA, scintillation proximity assay.

## Introduction

Fatty acids (FA) have many diverse functions ranging from being structurally the main component in cellular membranes, to play a central role in metabolic processes and acting as signaling molecules [1]. Long-chain n-3 polyunsaturated fatty acids (n-3 FA), such as eicosapentaenoic acid (EPA, 20:5n-3) has been given much attention during recent decades for their potentially beneficial effects on human health and diseases [2]. Among other things, n-3 FA exerts favourable effects on energy metabolism, including improvements in lipid metabolism and increased thermogenesis, and prevention of obesity [3–6].

In the mammalian cell there are certain processes that are entirely uncoupled, "futile", and therefore thermogenic or energy consuming. It is well known that brown adipose tissue is a highly thermogenic organ wherein uncoupling protein 1 play a central role [7]. In comparison, skeletal muscle mass in human is much greater and potential futile cycling or uncoupling mechanisms in muscle could therefore have a substantially effect on regulating energy homeostasis as well as muscle function [7]. The energy lost by triacylglycerol—fatty acid (TAG—FA) cycling is an example of a substrate cycle in which esterification of TAG is followed by hydrolysis, leading to heat expenditure [8]. For instance, it has been observed that TAG—FA cycling plays an important role in controlling lipid metabolism *in vivo* in humans during and after exercise [9]. This cycle is also present *in vitro* in cells such as isolated human white adipocytes [10, 11], 3T3-L1 mice adipocytes [12] and C2C12 myotubes [13]. Further, it has been observed that a combined intervention using n-3 FA (docosahexaenoic acid (DHA) and EPA) and mild calorie restriction exerted synergism in the prevention of obesity in mice fed a high-fat diet. This was associated with strong hypolipidemic and insulin-sensitizing effects involving a futile substrate cycle in white adipose tissue based on lipolysis of intracellular TAG and re-esterification of fatty acids, in association with induction of mitochondrial oxidative phosphorylation capacity, fatty acid  $\beta$ -oxidation and increased energy expenditure [6, 14]. Thus, there are some mechanistic animal studies that suggest futile TAG—FA cycling induced by feeding n-3 FA/EPA, and that this might also occur in human skeletal muscle. We have previously observed that pretreatment of human skeletal muscle cells (myotubes) with EPA promoted uptake of FA, increased TAG accumulation and fatty acid  $\beta$ -oxidation while also stimulating glucose uptake and oxidation without changing insulin action [15, 16]. EPA was also shown to increase FA accumulation compared to palmitic acid (PA) and oleic acid (OA), to positively influence energy metabolism and metabolic switching of myotubes [15–17]. In addition, we have observed in human myotubes that the differences between OA and PA on their cellular accumulation and lipolysis were eliminated when co-incubated with EPA [18]. However, in that study we did not focus on the possibility of EPA to increase cellular TAG—FA cycling.

In the present study our focus was therefore to simultaneously examine the effect of EPA compared to PA on real-time fatty acid accumulation, lipolysis and re-esterification and on fatty acid oxidation and mitochondrial function to further explore if an increased TAG—FA turnover, e.g. futile substrate cycling, may be present in skeletal muscle and possibly be involved in the favourable effects caused by EPA on cellular energy metabolism.

## Materials and methods

### Materials

Dulbecco's modified Eagles medium (DMEM-Glutamax), DMEM without phenol red, minimum essential media ( $\alpha$ MEM), heat-inactivated fetal calf serum (FCS) and horse serum, and penicillin-streptomycin-amphotericin B were purchased from Gibco Invitrogen (Gibco, Life Technologies, Paisley, UK). Ultraser G was purchased from PALL Life Science (Port

Washington, NY, US), insulin (Actrapid) from NovoNordisk (Bagsvaerd, Denmark), BSA (bovine serum albumin) (essentially fatty acid-free), Dulbecco's phosphate-buffered saline (DPBS with  $Mg^{2+}$  and  $Ca^{2+}$ ), eicosapentaenoic acid (EPA, 20:5n-3), palmitic acid (PA, 16:0), oleic acid (OA, 18:1n-9), linoleic acid (LA, 18:2n-6), extracellular matrix gel, HEPES, A922500 (DGAT1 inhibitor) were all obtained from Sigma (St. Louis, MO, US).

[1- $^{14}C$ ]oleic acid (58.2 mCi/mmol) was from PerkinElmer NEN (Boston, MA, US). Corning CellBIND tissue culture 96-well plates were obtained from Corning Life-Sciences (Schiphol-Rijk, The Netherlands). Biocoat 25 cm<sup>2</sup> cell flasks were from BD Biosciences (Franklin Lakes, NJ, US) and 12-well plates from Corning Life-Sciences (Lowell, MA, US). Ecoscint A scintillation solution was from National diagnostics (Hessle, England, UK). OptiPhase Supermix, UniFilter-96 GF/B, ScintiPlate-96 TC plates and all liquid scintillation was performed by 2450 MicroBeta<sub>2</sub> scintillation counter, were obtained from PerkinElmer (Shelton, CT, US). Thin layer chromatography plates were purchased from Merck (Darmstadt, Germany). NuGO human Genechip arrays were obtained from Affymetrix (Santa Clara, CA, US). Seahorse XF96e analyzer, XF Base medium and XF Cell Mito Stress Test Kit were from Agilent (Wilmington, DE, US).

## Methods

**Cell culture.** Satellite cells were isolated as previously described [19] from the *m. obliquus internus abdominis*, *m. vastus lateralis* or *mm. interspinales* of 9 healthy donors. Donors were both male (4) and female (5),  $38 \pm 5$  years old, had a body mass index of  $22.5 \pm 1.1$  kg/m<sup>2</sup> and fasting glucose  $5.3 \pm 0.3$  mM. The biopsies were obtained with informed consent and approved by the National Committee for Research Ethics, Norway (S-04133 REK sør, 2011/2007 REK sør-øst B, 2015/124 REK sør-øst B). Clonetics human myoblasts isolated from two healthy female donors were used for measurement of oxygen consumption rate (Lonza, Cologne, Germany). Skeletal muscle cells from each donor (at passage 2–4) were cultured on 12- or 96-well plates or 25 cm<sup>2</sup> flasks in DMEM-Glutamax (5.5 mM glucose), 2% fetal calf serum (FCS), 2% Ultrosor G, 25 IU penicillin, 25 µg/ml streptomycin, and 1.25 µg/ml amphotericin B. At 70–80% confluence, the growth medium was replaced by DMEM-Glutamax supplemented with 2% FCS, 25 IU penicillin, 25 µg/ml streptomycin, 1.25 µg/ml amphotericin B, and 25 pM insulin to induce differentiation of myoblasts to form multinucleated myotubes. Experiments were performed after 6–7 days of differentiation. The cells were cultured in humidified 5% CO<sub>2</sub> atmosphere at 37°C, and the media were changed every 2–3 days. Each experiment were performed with different donors, however not all donors were used in all experiments. For the oxygen consumption rate measurements, skeletal muscle cells cultured and differentiation into myotubes were initiated by replacing the growth medium by  $\alpha$ MEM containing 2% horse serum.

**Scintillation proximity assay (SPA).** Radiolabeled substrates taken up and accumulated by adherent cells will be concentrated close to the scintillator embedded in the plastic bottom of each well (ScintiPlate-96 TC, PerkinElmer) and provide a stronger signal than the radiolabel dissolved in the medium alone [20]. Myotubes were cultured in 96-well ScintiPlate as described above with a mixture of 100 µM fatty acids. Measurements of fatty acids present in the cell by scintillation proximity assay (SPA) were performed in medium without phenol red with [1- $^{14}C$ ]OA (0.5 µCi/ml, 9 µM) and non-labeled PA (16:0) and EPA (20:5, n-3) and were monitored for 0, 1, 2, 4, 6 and 24 h during the incubation. Thereafter, the media were changed to DPBS with 10 mM HEPES, 0.5% BSA, and 0.1 mM glucose and liquid scintillation measurements were monitored at 0, 1, 2, 4 and 6 h. The decline in [1- $^{14}C$ ]OA present in the cells in the absence and presence of triacsin C (10 µM) was then studied. Triacsin C inhibits long-chain

fatty acyl-CoA synthetase and will therefore inhibit, among other pathways, fatty acid re-esterification. Earlier reports in human skeletal myotubes have shown that TAG synthesis is efficiently blocked with incubation of 10  $\mu\text{M}$  triacsin C (an inhibitor of fatty acid re-esterification and oxidation) for 3 h [21]. Re-esterification can be estimated as fatty acid present in the cells, calculating the difference with and without triacsin C present, as previously reported by Bezaire et al. [22]. The amount of radioactivity in the cells was related to total cell protein content measured according to Bradford [23].

**Lipid distribution.** Myotubes were treated with a mixture of 100  $\mu\text{M}$  fatty acids for 24 h. The mixture was trace amounts of [ $1\text{-}^{14}\text{C}$ ]OA (0.5  $\mu\text{Ci/ml}$ , 9  $\mu\text{M}$ ) and non-labeled PA (16:0) and EPA (20:5, n-3). After incubation the myotubes were washed twice with PBS and harvested with two additions of 125  $\mu\text{l}$  distilled water. Cellular lipids were extracted as previously described [24] by extraction of homogenized cell fraction, separation of lipids by thin layer chromatography and quantification by liquid scintillation. A non-polar solvent mixture of hexane:ether:acetic acid (65:35:1) was used to separate the lipids. The amount of neutral lipids was related to total cell protein content.

**Acid soluble metabolites.** Myotubes were treated with a mixture of 100  $\mu\text{M}$  fatty acids for 24 h. The mixture was trace amounts of [ $1\text{-}^{14}\text{C}$ ]OA (0.5  $\mu\text{Ci/ml}$ , 9  $\mu\text{M}$ ) and non-labeled PA (16:0) and EPA (20:5, n-3). Measurement of acid soluble metabolites (ASMs) was performed using a method modified from Skrede et al. [25]. Incubation media (100  $\mu\text{l}$ ) were transferred to Eppendorf tube, precipitated with 300  $\mu\text{l}$   $\text{HClO}_4$  (1 M) and 30  $\mu\text{l}$  BSA (6%), and centrifuged at 10,000 rpm (9600 $\times g$ ) for 10 min at 4°C. Then, 200  $\mu\text{l}$  of the supernatant was counted by liquid scintillation. ASMs consist mainly of tricarboxylic acid cycle metabolites and reflect incomplete fatty acid oxidation, and were related to total cell protein content.

**Substrate oxidation assay.** Myotubes were cultured on 96-well CellBIND microplates. The cells were preincubated with 100  $\mu\text{M}$  PA or EPA for 24 h. Then [ $1\text{-}^{14}\text{C}$ ]OA (0.5  $\mu\text{Ci/ml}$ , 100  $\mu\text{M}$ ) was given to the cells in DPBS (with  $\text{Mg}^{2+}$  and  $\text{Ca}^{2+}$ , Gibco) with 10 mM HEPES and 1 mM L-carnitine during the 4 h  $\text{CO}_2$  oxidation assessment. OA was bound to BSA at a ratio of 2.5:1. A 96-well UNIFILTER microplate (PerkinElmer) was mounted on top of the CellBIND plate as previously described [20], and the cells were incubated at 37°C for 4 h. The [ $^{14}\text{C}$ ]CO<sub>2</sub> trapped in the filter was counted by liquid scintillation, and the result reflects CO<sub>2</sub> production. The remaining cell-associated radioactivity (substrate accumulated) was also assessed by liquid scintillation, and both CO<sub>2</sub> and cell-associated were related to total cell protein content.

**Measurement of oxygen consumption rate.** Oxygen consumption rates (OCR) were recorded in primary human skeletal muscle cells from two different donors (Lonza) on a Seahorse XF96e analyzer. One hour before the start of the recordings, the medium was changed to Seahorse XF Base medium, supplemented with 5 mM glucose, 2 mM glutamine, 1 mM sodium pyruvate and 0.5 mM HEPES, pH 7.4. Then, OCR was recorded three times at 6 min intervals at baseline, and following injections with 5  $\mu\text{M}$  oligomycin, 3  $\mu\text{M}$  FCCP and 4  $\mu\text{M}$  rotenone/antimycin A (XF Cell Mito Stress Test Kit), respectively. Determinant of mitochondrial function (basal respiration, proton leak, maximal respiration, spare respiratory capacity, non-mitochondrial oxygen consumption and ATP production) were calculated by the Seahorse XF Mito Stress Test Report Generator using the following formulae: basal respiration = last rate measurement before first injection–non-mitochondrial respiration rate; proton leak = minimum rate measurement after oligomycin injection–non-mitochondrial respiration; maximal respiration = maximum rate measurement after FCCP injection–non-mitochondrial respiration; spare respiratory capacity = maximal respiration–basal respiration; non-mitochondrial oxygen consumption = minimum rate measurement after rotenone/antimycin A injection;

ATP production = last rate measurement before oligomycin injection–minimum rate measurement after oligomycin injection.

**Gene expression and bioinformatics analysis.** Previously performed array was submitted to Gene Expression Omnibus (accession number: GSE18589). In short, human myotubes from three donors were cultured in 25 cm<sup>2</sup> flasks and preincubated with 100 μM PA or EPA for 24 h. Thereafter the cells were harvested, RNA isolated and Affymetrix human NuGO GeneChip arrays was run [17]. Here log<sub>2</sub>-transformed values were imported into *Partek Genomics Suite 6.6*. software for analysis, corrected for donor differences and 2-way ANOVA was performed. Genes with a p<0.05 for EPA vs PA were used for GO enrichment analysis.

**Presentation of data and statistics.** All values are reported as means ± SEM. The value n usually represents the number of different donors used each with at least triplicate samples. Linear mixed models (LMM) (SPSS version 20 (IBM SPSS Statistics, Armonk, NY, US) were used to compare effects of different fatty acids over time when SPA was used in accumulation, lipolysis and re-esterification experiments. A p-value <0.05 was considered significant. Student’s t-test was also used for comparison of EPA vs PA for single data points. Data underlying the findings are presented in [S1 File](#).

## Results

### Fatty acid accumulation was increased in myotubes during co-incubation with eicosapentaenoic acid

Myotubes were treated with mixtures of 100 μM fatty acids for 24 h and cell-associated radioactivity was measured during 24 h by scintillation proximity assay (SPA). By using non-labelled PA or EPA it was necessary to use a different fatty acid as tracer, like [<sup>14</sup>C]OA, to study the effect the two fatty acids had on lipid metabolism. The FA mixtures were trace amounts of [<sup>14</sup>C]OA (9 μM) and non-labeled PA (16:0) or EPA (20:5n-3). Co-incubation of human myotubes with eicosapentaenoic acid (EPA) markedly increased real-time accumulation of labeled OA as compared to co-incubation with PA at all time points measured ([Fig 1A](#)). The difference in accumulation between EPA and PA was established already after 1 h of co-incubation. For co-incubation experiments with [<sup>14</sup>C]OA and LA (18:2n-6) the effect on

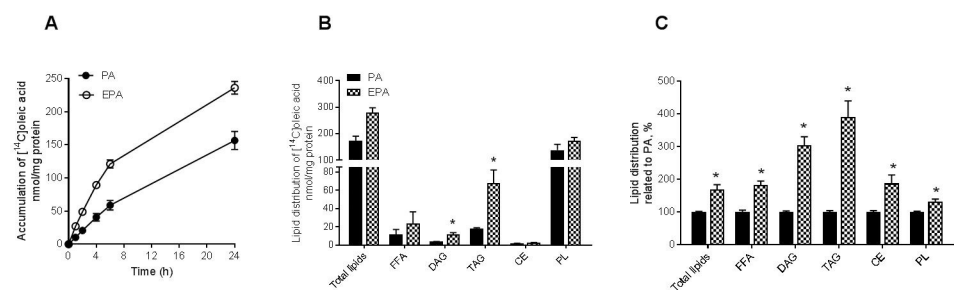

**Fig 1. Accumulation and distribution of oleic acid in myotubes when co-incubated with fatty acids.** Human myotubes were grown and differentiated in 96-well ScintiPlate or 12-well tissue culture plates. On day 6 of differentiation the myotubes were treated with a mixture of 100 μM fatty acids for 24 h. The mixture was trace amounts of [<sup>14</sup>C]OA (9 μM) and non-labeled PA (16:0) or EPA (20:5, n-3) (91 μM). (A) Cell-associated radioactivity was measured during 24 h by SPA. Real-time accumulation of radiolabel was monitored as described in Methods. Results represent mean ± SEM (nmol/mg protein) for n = 3 donors. Significant increase for EPA vs. PA (all-over effect). p<0.05 for EPA vs. PA, LMM statistical test (SPSS). (B-C) Lipids were separated by thin layer chromatography and quantified by liquid scintillation. Results are shown as mean ± SEM for absolute values, nmol/mg protein (B) and related to PA, % (C) from 4 individual experiments. \*p<0.05 for EPA vs. PA (t-test). EPA, eicosapentaenoic acid; PA, palmitic acid; SPA, scintillation proximity assay; LMM, linear mixed model; FFA, free fatty acid; DAG, diacylglycerol; TAG, triacylglycerol; CE, cholesteryl ester; PL, phospholipids.

<https://doi.org/10.1371/journal.pone.0208048.g001>

fatty acid accumulation was similar to the effect of PA (S1 Fig). Moreover, also when using [<sup>14</sup>C]PA as substrate EPA showed increased accumulation during co-incubation compared to OA and LA (S1 Fig).

### Lipid distribution was changed after co-incubation with eicosapentaenoic acid

Myotubes were treated with the two mixtures of 100 μM fatty acids as described above for 24 h and lipid distribution was measured. EPA caused a significantly higher incorporation of labeled OA into diacylglycerol (DAG) and triacylglycerol (TAG) in comparison with PA (Fig 1B). When relating the data to PA, EPA significantly increased the incorporation of labeled OA into all lipid classes (total cellular lipids, free fatty acids, phospholipids, DAG, TAG and cholesteryl ester) (Fig 1C). The greatest difference between EPA and PA was observed with a 3.9-fold increase for TAG and 3-fold for DAG, respectively. The level of unesterified oleic acid in the cells was also higher for EPA compared to PA (Fig 1C).

### Lipolysis and fatty acid re-esterification was increased after co-incubation with eicosapentaenoic acid

After 24 h co-incubation with PA or EPA and [<sup>14</sup>C]OA total lipolysis (lipolysis in presence of triacsin C) was measured by SPA at 0, 1, 2, 4 and 6 h. Total lipolysis was markedly increased by EPA compared to PA for all time points measured (Fig 2A). The relative decline in cell-associated [<sup>14</sup>C]OA after 24 h co-incubation was also significantly higher for EPA compared to PA indicating that lipolysis of [<sup>14</sup>C]OA was increased also when adjusting for increased accumulation of labeled OA in the presence of EPA (Fig 2B). After 24 h co-incubation with PA or EPA, re-esterification of [<sup>14</sup>C]OA was also increased by EPA during 2–6 h compared to PA (Fig 2C).

### Fatty acid beta-oxidation was increased during co-incubation with eicosapentaenoic acid

Myotubes were co-incubated with the same mixtures of fatty acids as above. Cell culture medium was collected at 24 h and fatty acid oxidation measured as acid-soluble metabolites

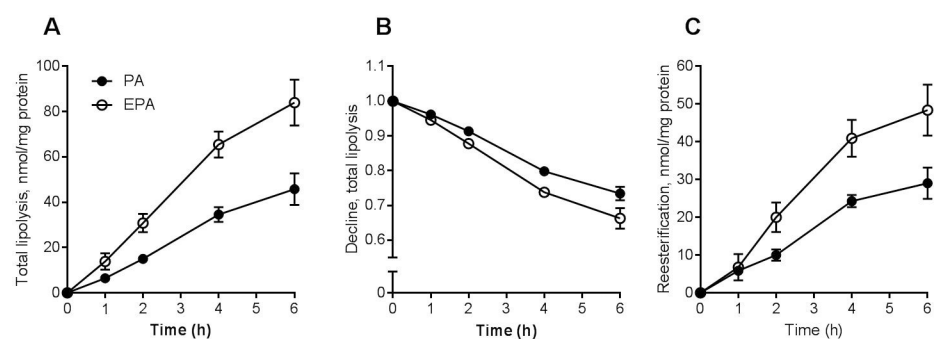

**Fig 2. Lipolysis and re-esterification of oleic acid in myotubes after co-incubation with fatty acids.** Human myotubes were grown and differentiated in 96-well ScintiPlate tissue culture plates. On day 6 of differentiation the myotubes were treated with a mixture of 100 μM fatty acids for 24 h. The mixture was trace amounts of [<sup>14</sup>C]OA (9 μM) and non-labeled PA or EPA (20:5, n-3) (91 μM). (A) Total lipolysis (lipolysis measured in presence triacsin C, 10 μM) of cell-associated [<sup>14</sup>C]OA at 1, 2, 4, and 6 h after 24 h pretreatment. (B) Total lipolysis presented as relative decline (i.e. data normalized to cell-associated radioactivity at zero time) in cell-associated [<sup>14</sup>C]OA at 1, 2, 4, and 6 h after 24 h pretreatment. (C) Re-esterification of [<sup>14</sup>C]OA, calculated as the difference between lipolysis measured at 1, 2, 4, and 6 h by SPA in the presence or absence of triacsin C (10 μM). Results represent mean ± SEM as nmol/mg protein (A, C) and relative decline in cell-associated radioactivity (B) for n = 3 donors. Significant increased lipolysis, decline and re-esterification for EPA vs. PA. p < 0.05 for EPA vs. PA (all-over effect), LMM statistical test (SPSS). EPA, eicosapentaenoic acid; PA, palmitic acid; SPA, scintillation proximity assay; LMM, linear mixed model.

<https://doi.org/10.1371/journal.pone.0208048.g002>

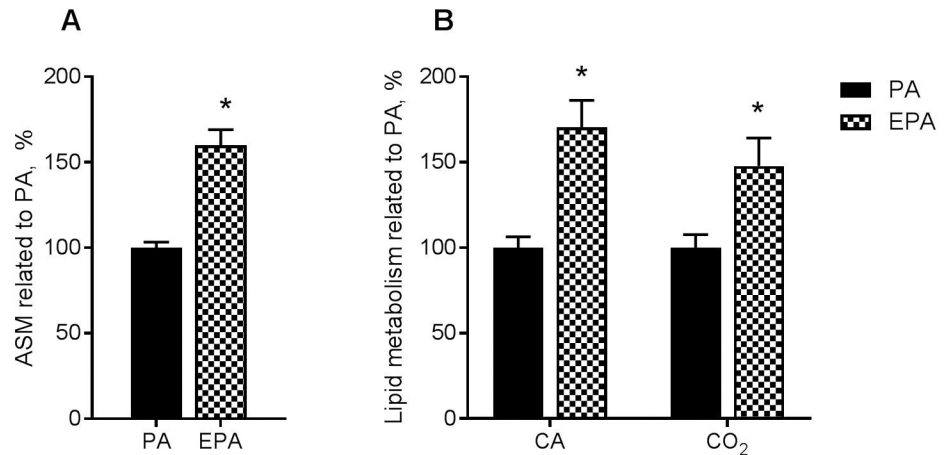

**Fig 3. Oleic acid accumulation and oxidation after preincubation with fatty acids.** (A) OA  $\beta$ -oxidation during co-incubation with fatty acids. Human myotubes were grown and differentiated in 12-well tissue culture plates. On day 6 of differentiation the myotubes were treated with a mixture of 100  $\mu$ M fatty acids for 24 h. The mixture was trace amounts of [<sup>14</sup>C]OA (9  $\mu$ M) and non-labeled PA (16:0) or EPA (20:5, n-3) (91  $\mu$ M). Figure shows formation of acid-soluble metabolites (ASMs) in myotubes after 24 h. Results are shown as mean  $\pm$  SEM (related to PA, %) from 4 individual experiments. Absolute values (mean  $\pm$  SEM); PA: 24.5  $\pm$  4.8; EPA: 41.3  $\pm$  8.7 nmol/mg cell protein. (B) OA accumulation and complete oxidation after preincubation with fatty acids. Human myotubes were treated with fatty acids (100  $\mu$ M EPA or PA) for 24 h. Thereafter, accumulation (cell-associated) and complete oxidation (CO<sub>2</sub> production) from added [<sup>14</sup>C]OA (100  $\mu$ M) was measured for 4 h. Results represent mean  $\pm$  SEM, n = 3. Absolute values (mean  $\pm$  SEM) for PA; CO<sub>2</sub>: 15.9  $\pm$  2.3; Cell-associated: 49.9  $\pm$  10.9 nmol/mg cell protein. \*p<0.05 for EPA vs. PA (t-test). CA, cell-associated; EPA, eicosapentaenoic acid; PA, palmitic acid.

<https://doi.org/10.1371/journal.pone.0208048.g003>

(ASMs), which give an indication of fatty acid  $\beta$ -oxidation. There was a 60% increase in formation of ASM in the presence of EPA when compared to PA (Fig 3A).

### Cell-associated fatty acid and complete fatty acid oxidation were increased in myotubes after incubation with eicosapentaenoic acid

Oleic acid metabolism was also examined after exposure to 100  $\mu$ M EPA or PA for 24 h (Fig 3B). Cell-associated and oxidation to carbondioxide (CO<sub>2</sub>) after 4 h incubation with [<sup>14</sup>C]OA was increased by 70% and 48% after pretreatment with EPA in comparison with PA.

### Mitochondrial respiration was increased after incubation with eicosapentaenoic acid

Mitochondrial respiration was determined in human skeletal muscle cells using an extracellular flux analyzer (Fig 4A). Basal respiration, proton leak and maximal respiration were significantly increased (by means 30, 30 and 19%, respectively) in cells exposed for 24 h to 100  $\mu$ M EPA compared to PA (Fig 4B), while ATP production tended to increase (mean increase 43%, p = 0.055).

### Microarray analysis of gene expression

Microarray analysis was performed to examine whether treatment for 24 h with 100  $\mu$ M EPA regulated gene expression differently in the myotubes compared to 100  $\mu$ M PA. Gene Ontology (GO) enrichment analysis revealed that, among others, the GO terms "Neutral lipid metabolic process" (GO:0006638) and "Regulation of lipid storage" (GO:0010883) were significantly changed (p<0.05) by EPA compared to PA (Fig 5). Genes involved in the GO terms in Fig 5

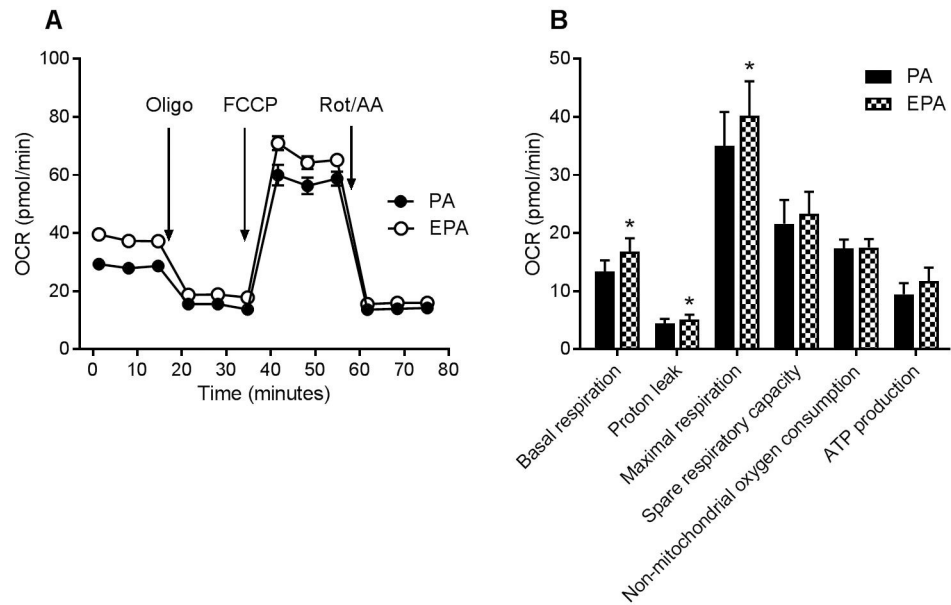

**Fig 4. Mitochondrial function after preincubation with fatty acids.** Human skeletal muscle cells were grown in 96-well Seahorse tissue culture plates, and treated with 100  $\mu$ M of PA or EPA for 24 h, before measurement of oxygen consumption rate (OCR) with the Seahorse XF96e analyzer. (A) OCR time curve from an experiment with one of two donors. (B) OCR parameter calculations by the Seahorse XF Mito Stress Test Report Generator from experiments with two different donors (n = 8). Results represent mean  $\pm$  SEM. \*p<0.05 for EPA vs. PA (t-test). EPA, eicosapentaenoic acid; PA, palmitic acid; Oligo, oligomycin; FCCP, carbonyl cyanide-p-trifluoromethoxyphenylhydrazone; Rot, rotenone, AA, antimycin A.

<https://doi.org/10.1371/journal.pone.0208048.g004>

are listed in [S1 Table](#). All genes that were differently regulated (EPA vs. PA) are listed in [S2 Table](#).

### Diacylglycerol acyltransferase 1 inhibition reduced the effect of eicosapentaenoic acid to promote lipid accumulation

To further look into mechanisms for increased TAG accumulation by EPA compared to PA we studied how the effect of a specific inhibitor of diacylglycerol acyltransferase 1 (A922500 [26]) affected lipid accumulation and turnover for 4 h ([Fig 6A](#)) or 24 h ([Fig 6B](#)). Diacylglycerol acyltransferase (DGAT) catalyse the last and dedicated step in TAG synthesis, the esterification of fatty acyl-CoA to DAG [27]. By using an inhibitor of DGAT we could determine if the effect of EPA on skeletal muscle cells was mechanistically linked to TAG accumulation and turnover. This inhibitor has previously been used in experiments with human myotubes showing 90% decrease in incorporation of [ $^{14}$ C]OA into TAG [18]. DGAT1 inhibition significantly reduced cell-associated [ $^{14}$ C]OA in myotubes both after preincubation with EPA ([Fig 6A](#)) and during co-incubation with EPA ([Fig 6B](#)), whereas there was no effect when cells were treated with PA.

### Discussion

In the present study our focus was to study the effects of fatty acids to modify cellular TAG—FA cycling in human skeletal muscle cells. Based on previous studies with different fatty acids we decided to examine the effect of eicosapentaenoic acid (EPA) compared to palmitic acid (PA) on real-time fatty acid accumulation, lipolysis, re-esterification and  $\beta$ -oxidation during co-incubation with trace amounts of labeled oleic acid (OA) in myotubes. We observed an enhanced accumulation, lipolysis and re-esterification of [ $^{14}$ C]OA by co-incubation with EPA



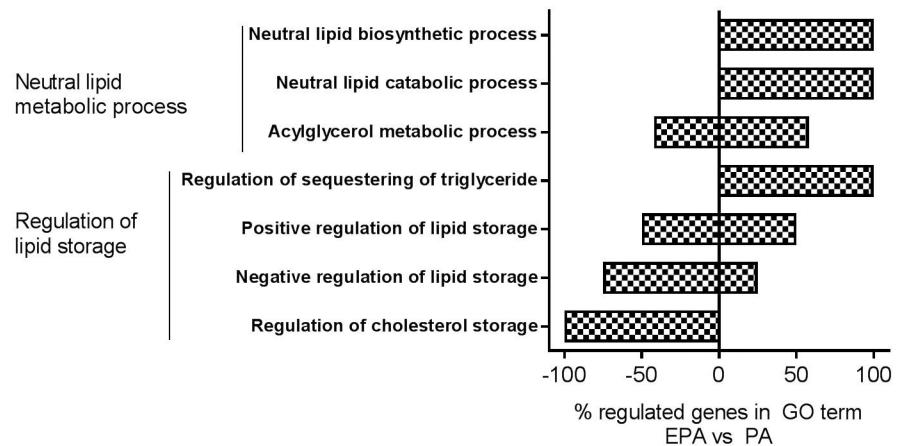

**Fig 5. GO enrichment analysis.** Myotubes were incubated with PA or EPA (100  $\mu$ M) for 24 h and then harvested for RNA isolation. Affymetrix human NuGO GeneChip arrays was used to measure gene expression and analysis performed in Partek Genomics Suite 6.6 software. GO enrichment analysis revealed that the GO terms "Neutral lipid metabolic process" (GO:0006638, upper 3) and "Regulation of lipid storage" (GO:0010883, lower 4) were changed significantly ( $p < 0.05$ ) by EPA vs. PA. They are presented with % of genes up- or down-regulated in each child GO term and genes are presented in S1 Table. EPA, eicosapentaenoic acid; PA, palmitic acid.

<https://doi.org/10.1371/journal.pone.0208048.g005>

when compared to PA. Lipid distribution showed that EPA promoted increased incorporation of [ $^{14}$ C]OA into various lipid classes, especially into DAG and TAG, and the level of unesterified [ $^{14}$ C]OA in the cells was also higher in presence of EPA compared to PA. Furthermore, an increased fatty acid  $\beta$ -oxidation was seen after co-incubation with EPA. Preincubation of myotubes with EPA also increased basal and maximal mitochondrial respiration and proton leak, as well as complete oxidation of [ $^{14}$ C]OA. Gene expression studies indicated that EPA,

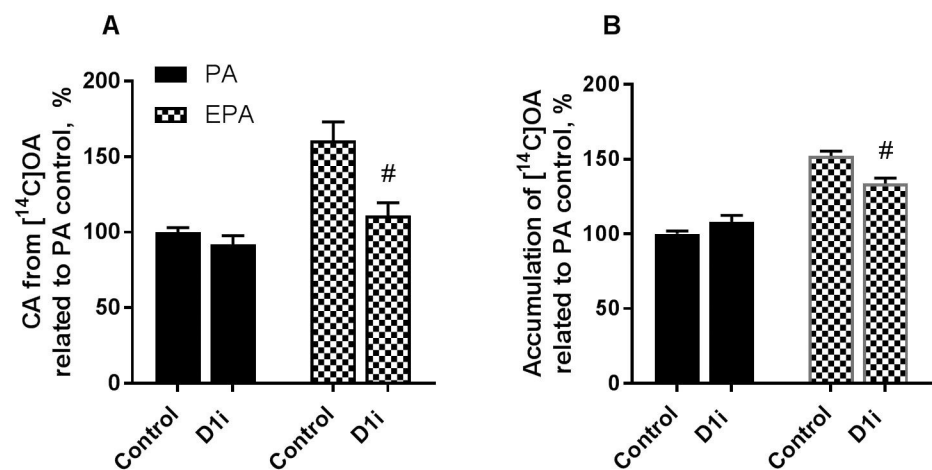

**Fig 6. Effect of DGAT1 inhibitor on cell-associated and accumulated oleic acid.** (A) Human myotubes were treated with fatty acids (100  $\mu$ M EPA or PA) for 24 h. Cell-associated [ $^{14}$ C]OA (100  $\mu$ M) was measured after 4 h with and without DGAT1 inhibitor (D1i, A922500, 1  $\mu$ M). Results represent mean  $\pm$  SEM, from experiments with 4 different donors and 4–8 parallels ( $n = 26$ ). Cell-associated PA (100%):  $53.8 \pm 4.0$  nmol/mg cell protein. (B) Human myotubes were grown and differentiated in 96-well ScintiPlate tissue culture plates. On day 6 of differentiation the myotubes were treated with a mixture of 100  $\mu$ M fatty acids for 24 h and cell-associated radioactivity was measured during 24 h by SPA. The mixture was trace amounts of [ $^{14}$ C]OA (9  $\mu$ M) and non-labeled PA or EPA (91  $\mu$ M). DGAT1 inhibitor was also added for 24 h. Results represent mean  $\pm$  SEM from experiments with 3 different donors and 8 parallels ( $n = 24$ ). Accumulated PA (100%):  $156 \pm 13.8$  nmol/mg cell protein. # $p < 0.05$  for D1i inhibitor vs. control in EPA-treated cells (t-test). EPA, eicosapentaenoic acid; PA, palmitic acid; D1i, diacylglycerol acyltransferase 1 inhibitor.

<https://doi.org/10.1371/journal.pone.0208048.g006>

compared to PA, did alter the expression of genes involved in neutral lipid metabolism and lipid storage. Finally, the effect of EPA to promote fatty acid accumulation was reduced by inhibition of diacylglycerol acyltransferase 1 (DGAT1), which catalyzes the conversion of DAG and fatty acyl-CoA to TAG.

The effect of EPA to increase uptake of fatty acids acutely (during 4 h) after pretreatment, as well as during co-incubation is in accordance with our previous observations that EPA promoted accumulation of labeled fatty acids such as OA and PA [15, 16, 18]. In the present study this effect was established already after 1 h of co-incubation. Previously, we have seen that chronic incubation of human myotubes with EPA for 24 h or 4 days, respectively, promoted uptake of both labeled OA and PA, increased TAG accumulation and fatty acid  $\beta$ -oxidation and reduced the levels of acyl-CoA [16]. Consistent with this, treatment with EPA increased the number of lipid droplets compared to PA in another study on human myotubes [17]. Furthermore, we have also observed that the differences between OA and PA on their cellular accumulation and lipolysis were eliminated in human myotubes when co-incubated with EPA [18].

Here we in addition observed indications of an increased TAG—FA cycling after EPA exposure in myotubes. The observation that EPA increased lipolysis and re-esterification might be a result of a higher accumulation of TAG. However, EPA also caused increased lipolysis compared to PA when adjusting for the amount of accumulated fatty acid in the cells. Moreover, fatty acid re-esterification was simultaneously increased by EPA. Combined with co-incubation data this indicates a higher enrichment in TAG as well as increased turnover of labeled fatty acids in the presence of EPA when compared to PA, but also during co-incubation with other fatty acids such as LA and OA. It was shown *in vivo* in mice that n-3 FA supplementation to a high-fat saturated diet modulated metabolic pathways of TAG synthesis, lipolysis, fatty acid oxidation and thermogenesis in skeletal muscle at mRNA and protein levels suggesting activation of TAG—FA substrate cycling [28]. To study TAG accumulation and turnover in more detail we blocked the final step in the synthesis of TAG using an inhibitor of DGAT1. Our data showed that DGAT1 inhibition counteracted EPA's effect to promote OA accumulation, indicating that the effect of EPA on fatty acid metabolism and lipid turnover may be dependent of TAG synthesis and possibly be mediated through increased TAG—FA cycling. Accordingly, there was no effect of DGAT1 inhibition on OA accumulation after co-incubation with PA. In another study, increased fatty acid uptake was shown to increase futile cycling of fatty acids into TAG in C2C12 mice skeletal muscle cells [13]. They observed that cycling of fatty acids was important for maintaining a low TAG content and insulin responsiveness of the cells [13]. Futile cycling of TAG has been described in adipocytes by induction of glycerol kinase and glycerogenesis mediated by PGC-1 alpha and PPARs activation [11, 12, 29]. It is known that n-3 fatty acids activates PPAR isoforms [30–32], although their affinity for the receptors may vary. However, we have previously observed that various fatty acids (PA, OA, LA and EPA) increase mRNA expressions of PPAR-regulated genes in skeletal muscle cells compared to a fatty acid-free control [17]. This is likely because both saturated and unsaturated fatty acids are ligands for PPAR activation [33], which further might explain why there was only small effects on PPAR-regulated genes in our microarray gene expression analysis when EPA was compared with PA.

In the present study mitochondrial respiration and proton leak was increased in myotubes after exposure to EPA for 24 h. We have previously observed that pretreatment of human myotubes with EPA promoted fatty acid  $\beta$ -oxidation, while also stimulating glucose transport and oxidation compared to OA [15, 16]. There are also *in vivo* studies that suggest increased skeletal muscle mitochondrial function after n-3 FA supplementation [28, 34]. Ten weeks of EPA supplementation in aging mice improved mitochondrial oxidative capacity and bioenergetic

efficiency in skeletal muscle, however supplementation of another n-3 FA, docosahexaenoic acid (DHA), had no effect [34]. In a study in older human adults, 16 weeks of n-3 PUFA supplementation did not change skeletal muscle mitochondrial respiration, but reduced mitochondrial ROS production [35], neither did supplementation of EPA plus DHA for 6 months change muscle mitochondrial function in insulin-resistant non-diabetic humans [36]. However, in young, healthy adults 12 weeks of EPA plus DHA supplementation improved mitochondrial membrane composition and ADP kinetics in skeletal muscle [37].

In our study, we compared expression of genes induced by EPA related to PA, and the fold changes found (S2 table) are in general small (e.g. carnitine palmitoyltransferase 1A (CPT1A), perilipin 2 (PLIN2) and monoglyceride lipase (MGLL) with fold change 1.2–1.4) or opposite of expected (e.g. cluster of differentiation 36/fatty acid translocase (CD36) fold change -1.33). Therefore, GO enrichment analysis from the microarray mRNA expression analysis was exerted to get a more overall picture of the biological processes that may be modified differently by the two fatty acids. GO enrichment analysis revealed that EPA compared to PA enhanced only some biological processes involved in neutral lipid biosynthesis and catabolic processes. Among GO terms under “Regulation of lipid storage”, “Regulation of sequestering of triglyceride” was increased and “Negative regulation of lipid storage” was decreased by EPA. Among GO terms under “Neutral lipid metabolic process”, both “Neutral lipid biosynthetic process” and “Neutral lipid catabolic process” were increased by EPA. This, as well as the acute effect of EPA to promote fatty acid accumulation during co-incubation, suggest that the effects of EPA on lipid turnover and oxidation in part may be mediated by changes in gene expression and that non-genomic mechanisms also may be involved [38, 39]

Skeletal muscle is the largest organ and a major contributor to basal metabolic rate. Increasing energy expenditure in muscle through non-shivering thermogenic mechanisms such as TAG—FA cycling could substantially affect whole body metabolism and body weight gain [40, 41]. Although heat production from muscle has long been recognized as a thermogenic mechanism, whether muscle can produce heat independently of contraction remains controversial. Thus, current evidence does not indicate a clear role of skeletal muscle in non-shivering thermogenesis, which may be due to lack of methods allowing measurement of these processes separately from other muscle thermogenic processes [40]. We believe our cell model is a valuable tool to study some of these processes in more detail.

In conclusion, findings from this study suggest an increased TAG—FA turnover i.e. futile substrate cycling in human myotubes induced by EPA, combined with increased fatty acid oxidation and mitochondrial function. Our data indicate that enhancing these processes could be of importance for the potential favourable effects of long-chain n-3 fatty acids on skeletal muscle as well as whole-body energy metabolism.

## Supporting information

**S1 File. Data underlying the findings.** Absolute data from each experiment. (XLSX)

**S1 Fig. Real time fatty acid accumulation in myotubes when co-incubated with various fatty acids.** Human myotubes were grown and differentiated in 96-well ScintiPlate. On day 6 of differentiation the myotubes were treated with a mixture of 100  $\mu$ M fatty acids for 24 h and cell-associated (CA) radioactivity was measured during 24 h by SPA. The mixture was trace amounts of [ $^{14}$ C]OA (9  $\mu$ M) and non-labeled PA (16:0) and LA (18:2, n-6) (A), or or trace amounts of [ $^{14}$ C]PA (9  $\mu$ M) and non-labeled OA (18:1, n-9), LA (18:2, n-6) and EPA (20:5, n-3) (B). Results represent mean  $\pm$  SEM for n = 5–7 donors related to PA or OA at 24 h in percent (70  $\pm$  17 nmol/mg for PA (A) and 107  $\pm$  54 nmol/mg for OA (B)). Significant increase for

EPA vs. OA/LA (all-over effect).  $p < 0.05$  for EPA vs. OA/LA, LMM statistical test (SPSS). EPA, eicosapentaenoic acid; LA, linoleic acid; OA, oleic acid; PA, palmitic acid; SPA, scintillation proximity assay; LMM, linear mixed model.  
(TIF)

**S1 Table. Genes changed by EPA vs. PA in myotubes.** Genes in the GO terms "Neutral lipid metabolic process" (GO:0006638) and "Regulation of lipid storage" (GO:0010883) that is changed ( $p < 0.05$ ) for EPA vs. PA are presented. Myotubes from three donors were incubated with PA or EPA (100  $\mu\text{M}$ ) for 24 h and then harvested for RNA isolation. Gene expression was measured by Affymetrix human NuGO GeneChip arrays and analysis performed in *Partek Genomics Suite 6.6*. software. EPA, eicosapentaenoic acid; PA, palmitic acid.  
(DOCX)

**S2 Table. Genes changed by EPA vs. PA in myotubes.** Genes that is changed ( $p < 0.05$ ) for EPA vs. PA are presented. Myotubes from three donors were incubated with PA or EPA (100  $\mu\text{M}$ ) for 24 h and then harvested for RNA isolation. Gene expression was measured by Affymetrix human NuGO GeneChip arrays and analysis performed in *Partek Genomics Suite 6.6*. software. EPA, eicosapentaenoic acid; PA, palmitic acid.  
(XLSX)

## Acknowledgments

The authors thank the scientific staff at the muscle research group at University of Oslo for scientific discussions. We thank Katarina Fredriksson and Matthijs Hesselink at Maastricht University for performing the microarray experiment.

## Author Contributions

**Conceptualization:** Nils G. Løvsletten, Siril S. Bakke, G. Hege Thoresen, Arild C. Rustan.

**Formal analysis:** Nils G. Løvsletten.

**Funding acquisition:** G. Hege Thoresen, Arild C. Rustan.

**Investigation:** Nils G. Løvsletten, Siril S. Bakke, D. Margriet Ouwens, G. Hege Thoresen, Arild C. Rustan.

**Methodology:** Nils G. Løvsletten, Siril S. Bakke, G. Hege Thoresen, Arild C. Rustan.

**Project administration:** Nils G. Løvsletten, Arild C. Rustan.

**Resources:** G. Hege Thoresen.

**Supervision:** Eili T. Kase, G. Hege Thoresen, Arild C. Rustan.

**Validation:** Nils G. Løvsletten, Siril S. Bakke, G. Hege Thoresen, Arild C. Rustan.

**Visualization:** Nils G. Løvsletten.

**Writing – original draft:** Nils G. Løvsletten, Arild C. Rustan.

**Writing – review & editing:** Nils G. Løvsletten, Siril S. Bakke, Eili T. Kase, D. Margriet Ouwens, G. Hege Thoresen, Arild C. Rustan.

## References

1. Burdge GC, Calder PC. Introduction to fatty acids and lipids. *World Rev Nutr Diet*. 2015; 112:1–16. <https://doi.org/10.1159/000365423> PMID: 25471798

2. Riediger ND, Othman RA, Suh M, Moghadasian MH. A Systemic Review of the Roles of n-3 Fatty Acids in Health and Disease. *Journal of the American Dietetic Association*. 2009; 109(4):668–79. <https://doi.org/10.1016/j.jada.2008.12.022> PMID: 19328262
3. Howe P, Buckley J. Metabolic health benefits of long-chain omega-3 polyunsaturated fatty acids. *Mil Med*. 2014; 179(11 Suppl):138–43. <https://doi.org/10.7205/MILMED-D-14-00154> PMID: 25373098
4. Huang CW, Chien YS, Chen YJ, Ajuwon KM, Mersmann HM, Ding ST. Role of n-3 Polyunsaturated Fatty Acids in Ameliorating the Obesity-Induced Metabolic Syndrome in Animal Models and Humans. *Int J Mol Sci*. 2016; 17(10).
5. Buckley JD, Howe PR. Long-chain omega-3 polyunsaturated fatty acids may be beneficial for reducing obesity—a review. *Nutrients*. 2010; 2(12):1212–30. <https://doi.org/10.3390/nu2121212> PMID: 22254005
6. Janovska P, Flachs P, Kazdova L, Kopecky J. Anti-obesity effect of n-3 polyunsaturated fatty acids in mice fed high-fat diet is independent of cold-induced thermogenesis. *Physiol Res*. 2013; 62(2):153–61. PMID: 23234412
7. Betz MJ, Enerbäck S. Targeting thermogenesis in brown fat and muscle to treat obesity and metabolic disease. *Nature Reviews Endocrinology*. 2017; 14:77. <https://doi.org/10.1038/nrendo.2017.132> PMID: 29052591
8. Newsholme EA, Crabtree B. Substrate cycles in metabolic regulation and in heat generation. *Biochem Soc Symp*. 1976(41):61–109. PMID: 184791
9. Wolfe RR, Klein S, Carraro F, Weber JM. Role of triglyceride-fatty acid cycle in controlling fat metabolism in humans during and after exercise. *Am J Physiol*. 1990; 258(2 Pt 1):E382–9. <https://doi.org/10.1152/ajpendo.1990.258.2.E382> PMID: 2106269
10. Hammond VA, Johnston DG. Substrate cycling between triglyceride and fatty acid in human adipocytes. *Metabolism*. 1987; 36(4):308–13. PMID: 3550370
11. Mazzucotelli A, Viguier N, Tiraby C, Annicotte JS, Mairal A, Klimcakova E, et al. The transcriptional coactivator peroxisome proliferator activated receptor (PPAR)gamma coactivator-1 alpha and the nuclear receptor PPAR alpha control the expression of glycerol kinase and metabolism genes independently of PPAR gamma activation in human white adipocytes. *Diabetes*. 2007; 56(10):2467–75. <https://doi.org/10.2337/db06-1465> PMID: 17646210
12. Guan HP, Li Y, Jensen MV, Newgard CB, Steppan CM, Lazar MA. A futile metabolic cycle activated in adipocytes by antidiabetic agents. *Nat Med*. 2002; 8(10):1122–8. <https://doi.org/10.1038/nm780> PMID: 12357248
13. Bastie CC, Hajri T, Drover VA, Grimaldi PA, Abumrad NA. CD36 in myocytes channels fatty acids to a lipase-accessible triglyceride pool that is related to cell lipid and insulin responsiveness. *Diabetes*. 2004; 53(9):2209–16. PMID: 15331529
14. Flachs P, Ruhl R, Hensler M, Janovska P, Zouhar P, Kus V, et al. Synergistic induction of lipid catabolism and anti-inflammatory lipids in white fat of dietary obese mice in response to calorie restriction and n-3 fatty acids. *Diabetologia*. 2011; 54(10):2626–38. <https://doi.org/10.1007/s00125-011-2233-2> PMID: 21779874
15. Aas V, Rokling-Andersen MH, Kase ET, Thoresen GH, Rustan AC. Eicosapentaenoic acid (20:5 n-3) increases fatty acid and glucose uptake in cultured human skeletal muscle cells. *Journal of lipid research*. 2006; 47(2):366–74. <https://doi.org/10.1194/jlr.M500300-JLR200> PMID: 16301737
16. Wensaas AJ, Rustan AC, Just M, Berge RK, Drevon CA, Gaster M. Fatty acid incubation of myotubes from humans with type 2 diabetes leads to enhanced release of beta-oxidation products because of impaired fatty acid oxidation: effects of tetradecylthioacetic acid and eicosapentaenoic acid. *Diabetes*. 2009; 58(3):527–35. <https://doi.org/10.2337/db08-1043> PMID: 19066312
17. Hessvik NP, Bakke SS, Fredriksson K, Boekschoten MV, Fjorckenstad A, Koster G, et al. Metabolic switching of human myotubes is improved by n-3 fatty acids. *Journal of lipid research*. 2010; 51(8):2090–104. <https://doi.org/10.1194/jlr.M003319> PMID: 20363834
18. Bakke SS, Moro C, Nikolic N, Hessvik NP, Badin PM, Lauvhaug L, et al. Palmitic acid follows a different metabolic pathway than oleic acid in human skeletal muscle cells; lower lipolysis rate despite an increased level of adipose triglyceride lipase. *Biochimica et biophysica acta*. 2012; 1821(10):1323–33. <https://doi.org/10.1016/j.bbailip.2012.07.001> PMID: 22796147
19. Gaster M, Kristensen SR, Beck-Nielsen H, Schroder HD. A cellular model system of differentiated human myotubes. *APMIS: acta pathologica, microbiologica, et immunologica Scandinavica*. 2001; 109(11):735–44.
20. Wensaas AJ, Rustan AC, Lovstedt K, Kull B, Wikstrom S, Drevon CA, et al. Cell-based multiwell assays for the detection of substrate accumulation and oxidation. *Journal of lipid research*. 2007; 48(4):961–7. <https://doi.org/10.1194/jlr.D600047-JLR200> PMID: 17213484

21. Badin PM, Loubiere C, Coonen M, Louche K, Tavernier G, Bourlier V, et al. Regulation of skeletal muscle lipolysis and oxidative metabolism by the co-lipase CGI-58. *Journal of lipid research*. 2012; 53(5):839–48. <https://doi.org/10.1194/jlr.M019182> PMID: 22383684
22. Bezaire V, Mairal A, Ribet C, Lefort C, Girousse A, Jocken J, et al. Contribution of adipose triglyceride lipase and hormone-sensitive lipase to lipolysis in hMADS adipocytes. *The Journal of biological chemistry*. 2009; 284(27):18282–91. <https://doi.org/10.1074/jbc.M109.008631> PMID: 19433586
23. Bradford MM. A rapid and sensitive method for the quantitation of microgram quantities of protein utilizing the principle of protein-dye binding. *Anal Biochem*. 1976; 72:248–54. PMID: 942051
24. Gaster M, Rustan AC, Aas V, Beck-Nielsen H. Reduced lipid oxidation in skeletal muscle from type 2 diabetic subjects may be of genetic origin: evidence from cultured myotubes. *Diabetes*. 2004; 53(3):542–8. PMID: 14988236
25. Skrede S, Bremer J, Berge RK, Rustan AC. Stimulation of fatty acid oxidation by a 3-thia fatty acid reduces triacylglycerol secretion in cultured rat hepatocytes. *Journal of lipid research*. 1994; 35(8):1395–404. PMID: 7989864
26. Zhao G, Souers AJ, Voorbach M, Falls HD, Droz B, Brodjian S, et al. Validation of diacyl glycerolacyltransferase I as a novel target for the treatment of obesity and dyslipidemia using a potent and selective small molecule inhibitor. *J Med Chem*. 2008; 51(3):380–3. <https://doi.org/10.1021/jm7013887> PMID: 18183944
27. Yen C-LE, Stone SJ, Koliwad S, Harris C, Farese RV. DGAT enzymes and triacylglycerol biosynthesis. *Journal of lipid research*. 2008; 49(11):2283–301. <https://doi.org/10.1194/jlr.R800018-JLR200>
28. Philp LK, Heilbronn LK, Janovska A, Wittert GA. Dietary enrichment with fish oil prevents high fat-induced metabolic dysfunction in skeletal muscle in mice. *PLoS One*. 2015; 10(2):e0117494. <https://doi.org/10.1371/journal.pone.0117494> PMID: 25658742
29. Tordjman J, Chauvet G, Quette J, Beale EG, Forest C, Antoine B. Thiazolidinediones block fatty acid release by inducing glyceroneogenesis in fat cells. *J Biol Chem*. 2003; 278(21):18785–90. <https://doi.org/10.1074/jbc.M206999200> PMID: 12644461
30. Jump DB. Dietary polyunsaturated fatty acids and regulation of gene transcription. *Current opinion in lipidology*. 2002; 13(2):155–64. PMID: 11891418
31. Sampath H, Ntambi JM. Polyunsaturated fatty acid regulation of genes of lipid metabolism. *Annual review of nutrition*. 2005; 25:317–40. <https://doi.org/10.1146/annurev.nutr.25.051804.101917> PMID: 16011470
32. Grygiel-Górniak B. Peroxisome proliferator-activated receptors and their ligands: nutritional and clinical implications—a review. *Nutrition journal*. 2014; 13:17–. <https://doi.org/10.1186/1475-2891-13-17> PMID: 24524207
33. Varga T, Czimmerer Z, Nagy L. PPARs are a unique set of fatty acid regulated transcription factors controlling both lipid metabolism and inflammation. *Biochimica et Biophysica Acta (BBA)—Molecular Basis of Disease*. 2011; 1812(8):1007–22.
34. Johnson ML, Lalia AZ, Dasari S, Pallauf M, Fitch M, Hellerstein MK, et al. Eicosapentaenoic acid but not docosahexaenoic acid restores skeletal muscle mitochondrial oxidative capacity in old mice. *Aging Cell*. 2015; 14(5):734–43. <https://doi.org/10.1111/ace1.12352> PMID: 26010060
35. Lalia AZ, Dasari S, Robinson MM, Abid H, Morse DM, Klaus KA, et al. Influence of omega-3 fatty acids on skeletal muscle protein metabolism and mitochondrial bioenergetics in older adults. *Aging (Albany NY)*. 2017; 9(4):1096–129. <https://doi.org/10.18632/aging.101210> PMID: 28379838
36. Lalia AZ, Johnson ML, Jensen MD, Hames KC, Port JD, Lanza IR. Effects of Dietary n-3 Fatty Acids on Hepatic and Peripheral Insulin Sensitivity in Insulin-Resistant Humans. *Diabetes Care*. 2015; 38(7):1228–37. <https://doi.org/10.2337/dc14-3101> PMID: 25852206
37. Herbst EA, Paglialunga S, Gerling C, Whitfield J, Mukai K, Chabowski A, et al. Omega-3 supplementation alters mitochondrial membrane composition and respiration kinetics in human skeletal muscle. *J Physiol*. 2014; 592(6):1341–52. <https://doi.org/10.1113/jphysiol.2013.267336> PMID: 24396061
38. Madsen L, Rustan AC, Vaagenes H, Berge K, Dyro E, Berge RK. Eicosapentaenoic and docosahexaenoic acid affect mitochondrial and peroxisomal fatty acid oxidation in relation to substrate preference. *Lipids*. 1999; 34(9):951–63. PMID: 10574660
39. Jeromson S, Mackenzie I, Doherty MK, Whitfield PD, Bell G, Dick J, et al. Lipid remodeling and an altered membrane-associated proteome may drive the differential effects of EPA and DHA treatment on skeletal muscle glucose uptake and protein accretion. *Am J Physiol Endocrinol Metab*. 2018; 314(6):E605–e19. <https://doi.org/10.1152/ajpendo.00438.2015> PMID: 28655718
40. Tseng YH, Cypess AM, Kahn CR. Cellular bioenergetics as a target for obesity therapy. *Nat Rev Drug Discov*. 2010; 9(6):465–82. <https://doi.org/10.1038/nrd3138> PMID: 20514071

41. Periasamy M, Herrera JL, Reis FCG. Skeletal Muscle Thermogenesis and Its Role in Whole Body Energy Metabolism. *Diabetes Metab J*. 2017; 41(5):327–36. <https://doi.org/10.4093/dmj.2017.41.5.327>  
PMID: [29086530](https://pubmed.ncbi.nlm.nih.gov/29086530/)
