# Supplementary material for: Increased triacylglycerol - Fatty acid substrate cycling in human skeletal muscle cells exposed to eicosapentaenoic acid
Source: PLoS One. 2018 Nov 29;13(11):e0208048. doi: 10.1371/journal.pone.0208048 (PMC6264501; doi:10.1371/journal.pone.0208048)
Supplement: S1 File — Absolute data from each experiment. (XLSX) [file pone.0208048.s001.xlsx]

## Sheet: Figure 1 A, B and C
Figure 1A)	Accumulation of oleic acid as nmol/mg protein				Figure 1B and C)		Oleic acid incorporated in lipids as nmol/mg protein
Experiment	Time (h)	PA	EPA		Experiment	Lipids	PA	EPA
1	1	6.59637	21.2714		1	PL	183.488	189.385
1	1	7.26806	28.5529		1	PL	187.791	166.573
1	1	7.83642	28.4605		1	PL	174.717	179.138
1	1	9.89455	24.6627		2	PL	185.908	240.815
1	1	8.2756	22.5466		2	PL	145.67	166.342
1	1	10.0409	25.2818		2	PL	170.825	205.167
1	1	10.3854	24.7736		3	PL	108.666	130.371
1	1	11.6427	24.1637		3	PL	86.8675	137.597
1	2	15.5006	41.203		3	PL	76.0214	167.739
1	2	19.0657	50.9517		4	PL	108.383	187.986
1	2	16.7062	51.885		4	PL	119	150.521
1	2	17.1109	42.6907		4	PL	112.077	156.968
1	2	20.9344	46.7565		1	DAG	4.23922	8.57093
1	2	22.3037	55.3132		1	DAG	2.98916	7.72456
1	2	20.5469	46.1005		1	DAG	3.90028	8.73315
1	2	20.4608	48.7155		2	DAG	4.21305	8.8498
1	4	29.9506	82.0827		2	DAG	3.41165	8.12625
1	4	32.379	89.0869		2	DAG	3.29084	8.26023
1	4	35.9011	91.7389		3	DAG	4.38328	14.9887
1	4	36.0131	81.8147		3	DAG	3.04803	13.6173
1	4	36.7967	83.7644		3	DAG	3.41869	17.0379
1	4	40.6116	96.5994		4	DAG	4.69267	16.981
1	4	38.4932	86.0468		4	DAG	4.22505	12.7682
1	4	38.941	88.1813		4	DAG	4.3886	15.5629
1	6	44.814	104.241		1	TAG	24.159	47.7304
1	6	48.9647	120.587		1	TAG	14.4224	49.4161
1	6	50.7559	122.602		1	TAG	19.7249	43.5465
1	6	54.4502	108.667		2	TAG	22.2976	42.4114
1	6	55.5697	118.222		2	TAG	19.4596	40.2917
1	6	55.8539	133.653		2	TAG	16.999	48.7465
1	6	56.5342	116.457		3	TAG	18.8909	72.1872
1	6	58.8076	115.191		3	TAG	11.2576	68.247
1	24	123.712	220.938		3	TAG	14.6894	89.6651
1	24	130.817	243.171		4	TAG	18.6548	117.949
1	24	135.536	244.428		4	TAG	16.986	89.774
1	24	149.417	226.806		4	TAG	18.1529	105.035
1	24	147.101	243.282		1	FFA	1.77181	3.12911
1	24	160.784	261.421		1	FFA	3.25214	3.84036
1	24	147.557	236.444		1	FFA	1.44906	2.53583
1	24	150.95	230.013		2	FFA	1.65274	2.46788
2	1	19.4872	41.52		2	FFA	1.37554	2.15451
2	1	16.3583	30.1815		2	FFA	1.44282	2.84124
2	1	9.11328	33.7707		3	FFA	27.2168	52.8956
2	1	13.2446	34.7822		3	FFA	19.914	47.9184
2	1	11.5435	31.2583		3	FFA	21.3902	62.8636
2	1	17.4671	32.0087		4	FFA	18.8444	37.029
2	1	17.4215	33.1018		4	FFA	19.4268	31.6606
2	1	19.0316	30.9972		4	FFA	19.5032	33.9161
2	2	36.0126	73.6266		1	CE	3.00552	2.90439
2	2	25.5627	48.5841		1	CE	1.86171	2.53174
2	2	22.3427	45.1744		1	CE	2.39028	2.71324
2	2	24.5451	55.3056		2	CE	2.03549	1.27079
2	2	22.6617	50.5418		2	CE	2.20449	1.96716
2	2	25.0008	49.5792		2	CE	1.75219	2.88741
2	2	33.1268	56.0887		3	CE	1.22835	2.53988
2	2	30.8181	48.2415		3	CE	0.950691	2.78646
2	4	66.8155	128.9		3	CE	0.870073	2.97957
2	4	47.9055	87.6895		4	CE	1.19793	3.71722
2	4	41.6173	83.8883		4	CE	1.37033	2.95546
2	4	48.2244	95.1452		4	CE	0.88352	2.42623
2	4	49.0446	92.2249		1	Total lipid	216.663	251.72
2	4	51.004	94.7536		1	Total lipid	210.317	230.086
2	4	61.4994	106.043		1	Total lipid	202.181	236.667
2	4	50.0926	95.1778		2	Total lipid	216.107	295.815
2	6	93.6997	169.555		2	Total lipid	172.121	218.882
2	6	71.3873	124.641		2	Total lipid	194.31	267.902
2	6	61.4083	119.861		3	Total lipid	160.386	272.983
2	6	68.3799	131.526		3	Total lipid	122.038	270.166
2	6	68.4711	124.315		3	Total lipid	116.39	340.285
2	6	69.6558	129.813		4	Total lipid	151.772	363.662
2	6	84.3586	139.651		4	Total lipid	161.008	287.679
2	6	68.9267	124.951		4	Total lipid	155.005	313.908
2	24	213.16	286.855
2	24	173.41	249.038
2	24	161.791	241.387
2	24	178.195	246.64
2	24	180.154	251.224
2	24	180.929	255.336
2	24	208.542	264.586
2	24	174.215	216.883
3	1	7.75321	29.0916
3	1	3.88308	25.2806
3	1	5.91522	15.5349
3	1	6.18703	18.8659
3	1	6.51062	18.8222
3	1	8.49099	22.5751
3	1	6.0576	28.2043
3	1	6.16115	22.6914
3	2	19.2083	57.5722
3	2	7.85676	48.1611
3	2	14.1085	38.9391
3	2	12.3223	38.0227
3	2	18.0692	41.0918
3	2	15.5452	44.9901
3	2	16.969	49.2229
3	2	19.4154	44.9465
3	4	35.8926	101.82
3	4	25.706	79.9436
3	4	31.44	77.4999
3	4	29.4078	71.3616
3	4	35.3878	80.3655
3	4	36.0349	83.8419
3	4	45.7556	92.7148
3	4	31.7765	73.2526
3	6	56.2399	139.552
3	6	39.6591	109.646
3	6	47.3606	104.73
3	6	45.9756	97.0058
3	6	51.0107	107.93
3	6	53.3405	114.577
3	6	58.6862	124.352
3	6	48.8103	105.821
3	24	136.154	237.489
3	24	126.99	203.525
3	24	134.574	215.612
3	24	139.519	207.961
3	24	148.89	222.987
3	24	146.91	220.616
3	24	174.221	236.645
3	24	132.322	203.685

## Sheet: Figure 2 A, B and C
Figure 2A and B)		Lipolysis nmol/mg protein			Figure 2 C)		Re-esterification as nmol/mg protein
Experiment	Time (h)	PA	EPA		Experiment	Time (h)	PA	EPA
1	1	5.25298	20.0702		1	1	4.71907	9.68858
1	1	8.74923	17.9911		1	1	8.03448	7.48936
1	1	1.47256	14.1378		1	1	2.3337	3.10016
1	1	7.19056	10.8021		1	1	3.18624	7.52632
1	2	16.1981	35.9452		1	2	7.4446	23.071
1	2	12.7277	28.9133		1	2	11.1303	13.4517
1	2	14.8031	30.364		1	2	12.1637	10.9845
1	2	15.8451	26.8527		1	2	15.1949	24.3185
1	4	36.9345	71.7703		1	4	24.0367	41.1176
1	4	34.0238	63.38		1	4	25.8882	27.4602
1	4	26.2735	53.7053		1	4	20.4457	29.9274
1	4	28.8484	58.5196		1	4	19.8602	35.3423
1	6	35.66	73.2581		1	6	20.013	43.192
1	6	41.1369	74.5517		1	6	23.3887	34.5984
1	6	30.9323	66.032		1	6	21.9764	31.4844
1	6	33.1196	61.0515		1	6	21.83	36.4835
2	1	3.58456	21.2576		2	1	-3.09851	12.1175
2	1	7.98931	18.011		2	1	15.5685	11.5465
2	1	12.0143	16.1349		2	1	8.87026	12.509
2	1	7.39694	16.6243		2	1	2.41502	14.8909
2	2	20.2011	37.3924		2	2	6.88432	21.7511
2	2	11.4979	42.1399		2	2	14.6458	29.3862
2	2	22.6921	35.0269		2	2	12.413	29.7288
2	2	12.0903	28.0443		2	2	12.1852	29.5004
2	4	40.5237	78.5535		2	4	19.2214	50.6438
2	4	36.9543	77.3462		2	4	30.4763	45.9779
2	4	43.9412	73.3003		2	4	32.5724	51.3779
2	4	30.1346	60.363		2	4	27.6056	52.3894
2	6	54.9379	102.78		2	6	30.2561	61.1339
2	6	52.5532	100.692		2	6	40.8123	60.9055
2	6	64.4461	101.704		2	6	32.5952	62.7164
2	6	47.8751	86.9717		2	6	41.268	54.2492
3	1	5.56574	6.35651		3	1	7.05425	-3.8219
3	1	5.70812	6.2256		3	1	7.67555	7.64017
3	1	2.42045	10.8075		3	1	6.96365	0.0763654
3	1	8.82752	4.37828		3	1	6.5624	-1.13093
3	2	15.3511	26.9388		3	2	4.45583	13.4803
3	2	11.934	24.6115		3	2	6.5268	15.5894
3	2	7.99914	28.2916		3	2	14.0082	12.273
3	2	11.0668	15.7967		3	2	2.91554	16.6949
3	4	33.9899	60.9759		3	4	20.8651	39.9827
3	4	32.0095	54.1976		3	4	21.7323	38.79
3	4	31.2846	60.6705		3	4	26.8579	37.0154
3	4	26.7156	55.7685		3	4	21.8747	40.9718
3	6	42.9598	79.6382		3	6	28.1199	49.6739
3	6	46.3769	79.9873		3	6	26.6185	54.7358
3	6	47.27	83.3037		3	6	30.2297	46.7647
3	6	36.1385	77.1945		3	6	31.2523	44.5392

## Sheet: Figure 3 A and B
Figure 3A)		ASM from 14-C OA as nmol/mg protein				Figure 3B)	CO2 from 14-C OA as nmol/mg protein				CA from 14-C OA as nmol/mg protein
	Exp.	PA	EPA				Exp.	PA	EPA		Exp.	PA	EPA
	1	50.0444	73.3691				1	15.1312	16.9374		1	6.469	12.9933
	1	36.3356	54.3683				1	12.7906	23.8856		1	9.50999	18.4118
	1	45.3946	84.1503				1	9.25197	22.5217		1	8.18301	17.0295
	2	41.2355	62.4513				1	16.7715	32.8426		1	14.8179	30.1887
	2	30.8453	71.2522				1	8.95708	27.719		1	9.12296	16.6425
	2	34.7115	71.2393				1	7.2615	17.2322		1	4.92087	12.2192
	3	8.66248	11.054				1	7.63011	11.6295		1	6.30313	8.90179
	3	8.21843	11.0841				1	10.6895	4.03622		1	10.0076	5.58435
	3	10.5102	15.6876				2	11.3034	15.477		2	68.327	165.75
	4	9.26543	16.5183				2	16.3709	20.0097		2	98.2465	155.129
	4	9.99768	13.4923				2	13.1685	17.7011		2	73.2467	165.539
	4	8.5482	11.3624				2	15.5052	16.2301		2	96.4729	163.596
							3	10.8506	23.1402		3	97.189	110.023
							3	25.746	32.4352		3	95.5556	131.841
							3	35.8188	37.3744		3	102.556	147.009
							3	37.2966	31.2296		3	97.3057	147.242

## Sheet: Figure 4 A and B
Figure 4 A
Time, minutes	OCR, PA, pmol/min						OCR, EPA, pmol/min
1.35709	30.2035	30.1629	30.1092	29.7749	29.2482	26.5268	35.2141	41.5652	41.6746	41.1802	37.389	43.1552	40.7379	35.6334
8.02513	29.127	29.4275	25.8925	27.8534	27.9205	27.1489	33.1788	38.7713	39.864	38.4875	36.8824	41.5814	36.952	32.8627
14.6622	30.113	30.6868	26.7587	28.4415	28.8877	27.3389	32.8115	38.0782	39.8365	38.8263	35.6309	40.8323	38.1386	33.7918
21.4614	16.6115	14.3226	14.0305	18.1887	16.315	13.7697	16.7296	19.6169	21.2248	19.6331	19.2446	20.6684	17.6096	15.0723
28.1242	15.0194	14.9646	14.9918	17.3765	16.9974	14.1387	16.6168	19.4295	20.8098	20.1886	19.3358	20.8507	17.7256	15.9412
34.804	16.1349	12.6931	8.45236	15.224	15.9215	13.7696	16.39	18.8635	19.5251	19.1719	16.8194	19.5436	16.9214	15.0956
41.6109	70.2086	68.7574	48.5426	62.9423	53.6665	55.6472	71.6701	64.7823	81.1711	72.853	78.464	71.8185	61.8107	65.2196
48.2363	64.3854	62.9412	44.9891	56.9238	53.8749	54.6367	54.7951	59.9607	70.6533	64.4304	74.1133	67.4651	59.9459	62.5892
54.9037	62.7034	67.9663	51.1434	58.2452	56.4059	55.9826	58.0074	60.943	70.4488	64.3591	72.2268	69.7081	60.5681	65.2629
61.739	14.1122	14.5797	9.07586	16.6161	14.7803	12.6364	13.135	16.6002	18.7287	17.23	14.3188	16.8716	14.4047	13.4114
68.446	14.0119	14.364	9.05482	16.8048	15.8061	13.589	12.8941	17.4957	17.596	16.444	15.4138	18.2283	14.7419	14.8888
75.1686	15.3375	14.5903	9.71256	15.9499	16.2958	13.4232	13.1947	17.0151	17.1911	16.9191	15.4207	17.6745	15.4277	14.9619
Figure 4 B
	OCR, PA, pmol/min						OCR, EPA, pmol/min
Basal respiration	9.56	6.31	7.67	11.46	15.07	19.84	18.33	18.95	9.59	14.14	8.19	12.06	21.66	23.61	21.6	23.64
Proton leak	3.31	4.3	2.02	6.45		6.02	2.19	6.91	4.09	6.59	3.84	6.92	2.2	8.51	2.18	6.61
Maximal respiration	13.69	22.45	17.9	26.25	46.33	51.28	52.32	49.89	21.54	31.16	19.25	27.19	55.39	51.53	57.38	57.86
Spare respiratory capacity	4.13	16.14	10.23	14.79	31.26	31.44	33.98	30.93	11.95	17.02	11.06	15.13	33.73	27.91	35.78	34.22
Non-mitochondrial oxygen consumption	17.46	25.73	18.96	20.3	13.63	15.84	12.7	14.54	20.37	23.06	20.43	19.1	15.59	17.32	10.67	13.72
ATP production	6.26	2.01	5.64	5.02	15.01	13.81	16.14	12.04	5.5	7.55	4.35	5.13	19.45	15.1	19.42	17.03

## Sheet: Figure 5
Array is available on Gene Expression Omnibus (accession number: GSE18589)

## Sheet: Figur 6 A and B
Figure 6A)		CO2 from 14-C OA as nmol/mg protein				CA from 14-C OA as nmol/mg protein					Figure 6 B)		Accumulation of oleic acid as nmol/mg protein
	Exp.	PA	PA+D1i	EPA	EPA +D1i	PA	PA+D1i	EPA	EPA +D1i			Exp.	PA	PA+D1i	EPA	EPA +D1i
	1	28.4636	20.7589	31.9555	30.0167	44.0048	28.1996	68.611	46.8065			1	123.707	117.311	220.929	214.584
	1	28.2605	25.3167	31.5495	29.57	44.3703	36.9092	67.2711	52.4099			1	130.811	126.638	243.16	225.148
	1	27.083	22.6064	29.4888	28.7579	41.2031	36.4829	67.2711	49.9127			1	135.53	125.645	244.417	224.76
	1	30.0674	21.0533	27.5297	32.3311	64.713	36.8179	80.1832	60.0537			1	149.411	116.514	226.796	222.569
	1	31.651	21.0228	32.8894	30.372	59.0792	33.7421	95.7448	56.1556			1	147.094	133.191	243.271	227.709
	2	46.0623	42.9257	63.4494	57.6214	47.0498	34.1546	67.7284	56.5178			1	160.777	140.983	261.409	233.806
	2	45.617	43.1386	54.6397	62.7718	50.0122	43.2742	71.0974	52.2775			1	147.551	141.5	236.434	226.899
	2	61.0292	46.953	69.7034	57.0019	52.1614	38.1045	71.4459	48.0372			1	150.944	120.283	230.003	214.049
	2	51.1158	44.9393	58.9962	54.6784	42.8676	35.6068	57.6214	44.3197			2	213.16	192.247	286.855	214.883
	2	60.4677	48.134	68.4836	64.1077	54.601	34.387	77.7773	55.5303			2	173.41	175.449	249.038	206.282
	3	12.2419	13.306	9.55584	10.5527	40.498	51.4614	52.8601	36.6645			2	161.791	171.6	241.387	197.741
	3	10.3926	16.7669	10.1152	12.7287	49.4297	54.3633	62.6024	57.1318			2	178.195	182.368	246.64	204.106
	3	12.2049	15.3266	8.11081	11.4853	65.0186	59.5868	71.5989	48.6406			2	180.154	192.496	251.224	217.775
	3	5.32576	8.42642	5.09645	7.24782	48.4866	54.4278	60.1785	60.0767			2	180.929	192.138	255.336	219.876
	3	12.4268	16.0575	10.4415	8.55668	59.6374	71.0012	52.3008	43.8796			2	208.542	206.49	264.586	229.804
	3	12.6672	14.9827	10.2084	6.49522	64.1865	47.1407	66.2383	47.119			2	174.215	177.194	216.883	207.594
	3	9.32008	13.177	7.11638	7.39507	59.8038	58.7485	60.6446	49.0823			3	136.154	180.903	237.489	183.914
	3	6.47228	11.4574	7.92436	3.58301	56.7526	71.3881	66.8443	63.3162			3	126.99	198.384	203.525	176.748
	4	7.80115	17.9629	15.0394	17.1457	39.9066	41.8439	111.411	36.8			3	134.574	180.079	215.612	171.263
	4	6.09525	21.1539	9.52312	20.2602	38.4978	50.0252	91.3763	78.6067			3	139.519	176.871	207.961	183.8
	4	6.81403	13.7491	10.9456	18.7721	37.4628	41.0769	92.4839	78.0008			3	148.89	195.245	222.987	186.436
	4	9.13055	20.065	9.19736	27.8923	28.6362	34.1739	88.0861	58.6441			3	146.91	205.011	220.616	188.901
	4	12.3151	18.0481	11.7492	21.7803	42.5805	43.7472	106.752	70.9214			3	174.221	230.977	236.645	202.036
	4	13.1968	13.1431	12.8893	21.3976	47.4969	38.7759	94.3082	59.1224			3	132.322	152.535	203.685	181.905
	4	9.61248	16.9294	14.2684	12.7875	46.5769	35.6227	101.898	54.7855
	4	8.07908	14.3835	12.7047	19.2291	50.142	34.6285	113.658	89.8954
Figure 6B

## Sheet: Supporting information fig 1
Supporting information figur 1 A and 1B
Scintillation proximity assay - for 5 -7 experiments
1A)	Linoleic acid							Palmitic acid
Accumulation of 14-C oleic acid as nmol/mg protein
Experiment number	1	2	3	4	5	6	7	1	2	3	4	5	6	7
Time (h)
2	1.93621	5.85154	5.89287		19.5	28.7	3.9		4.24037	6.04477	2.24861	10.4	11.2	6.6
4	3.27343	11.6887	8.6192		36.4	51.3	7.3		8.54447	10.343	4.14046	20.4	23.1	12.7
6	4.46457	16.3566	13.7143		54.3	72.3	10.3		12.6991	16.3529	5.48642	29.8	36.2	18.9
8	5.59699	21.0493	18.1396		71.9	94.6	14		17.3904	17.9442	7.69247	39.5	48.8	24.2
24	13.3075	40.0701	29.2226		178.6	227	32		48.0221	45.3789	21.14	103.6	133.8	66.5
1B)	Oleic acid							Linoleic acid							Eicosapentaenoic acid
Accumulation of 14-C palmitic acid as nmol/mg protein
Experiment number	1	2	3	4	5	6	7	1	2	3	4	5	6	7	1	2	3	4	5	6	7
Time (h)
2	2.18592	7.06151	3.7533	4.11995	42.6	35.7	5.9	1.83989	10.7441	5.8057	2.53389	29.2	36.3	2.8	2.26686	11.9072	12.9513	6.37777	61.3	37.2	11.2
4	4.03655	12.336	5.77336	6.47289	76.1	64.7	10.3	3.25317	19.5279	10.6816	4.21451	52.2	69.4	5	4.02856	20.6528	22.0422	10.9534	111.2	67.8	22.4
6	5.3766	16.2831	7.70207	8.5557	107.2	90.9	15.4	4.53151	25.33	13.8726	5.49116	76.2	101.8	7.6	5.38552	27.5081	29.071	14.2727	155.3	94.2	32.5
8	6.60236	19.357	9.80663	10.939	139.6	117.4	19.7	5.72176	31.2005	18.5219	7.26042	102.7	133.4	10.1	6.54475	32.3035	38.6804	18.3512	196.1	122.3	42.6
24	15.2488	24.9249	23.1168	27.7228	314.2	289.5	55.9	13.2319	39.4856	49.0019	20.7762	277.4	363.9	32.4	12.6865	39.812	64.2025	39.2115	409.5	261.3	118.3
